# Supplementary material for: Genome-wide transcriptomic analysis of a superior biomass-degrading strain of A. fumigatus revealed active lignocellulose-degrading genes
Source: PubMed Central journal article supplement (PMC4469458; doi:10.1186/s12864-015-1658-2), 2015-06-16

Additional file 2: all scaffolds matched to the chromosomes of *Aspergillus fumigatus* AF293

**a:** scaffolds matched to chromosome 1 of af293 (y-axis: all scaffolds, x-axis: chromosome 1)

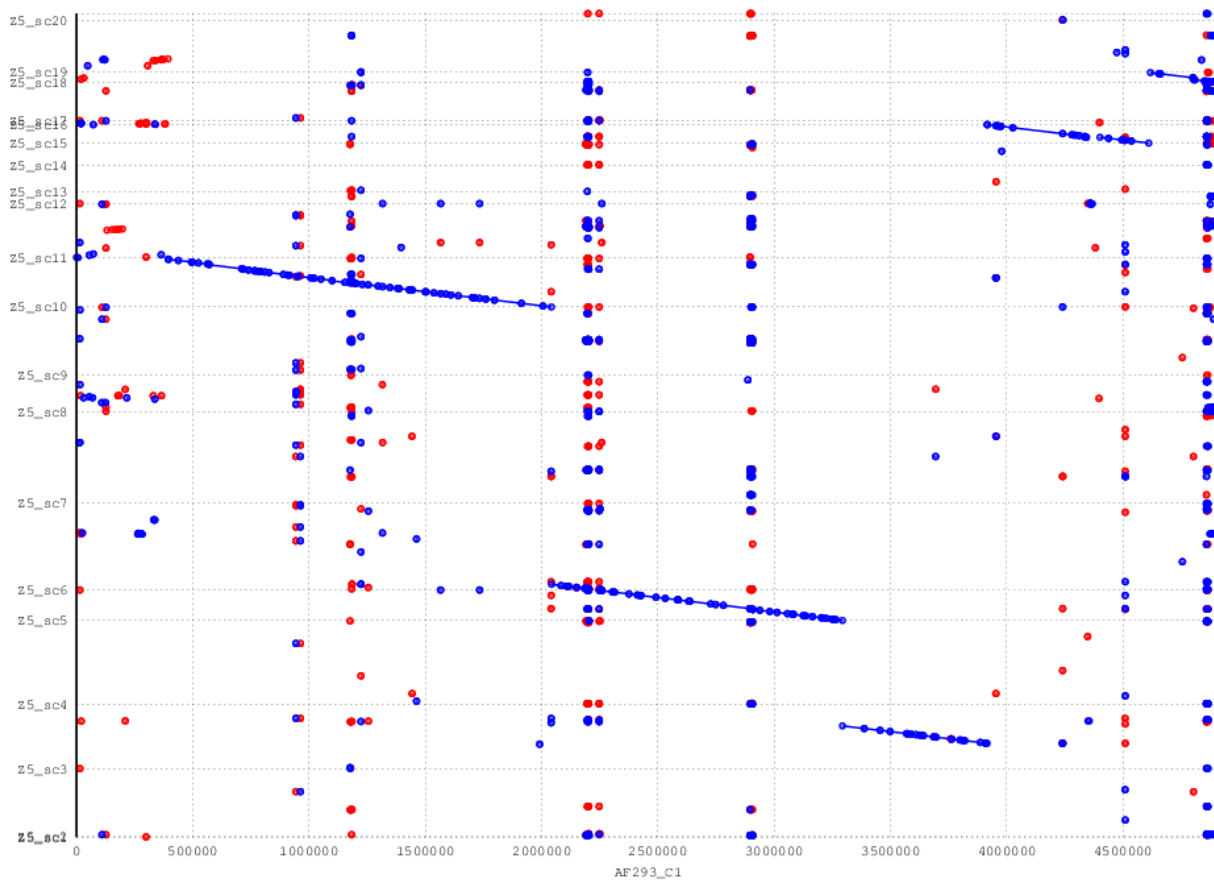

**b:** scaffolds matched to chromosome 2 of af293 (y-axis: all scaffolds, x-axis: chromosome 2)

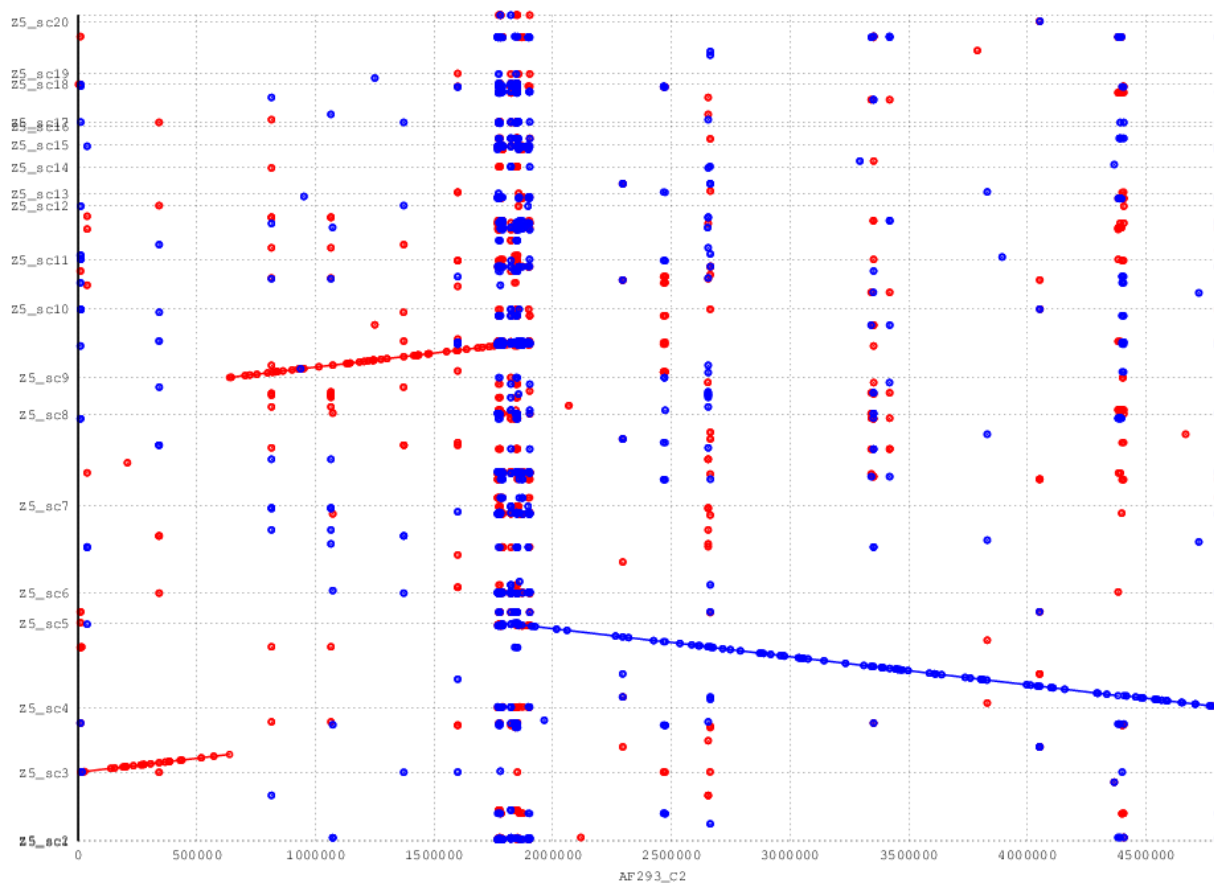

**c:** scaffolds matched to chromosome 3 of af293 ( y-axis: all scaffolds, x-axis: chromosome 3)

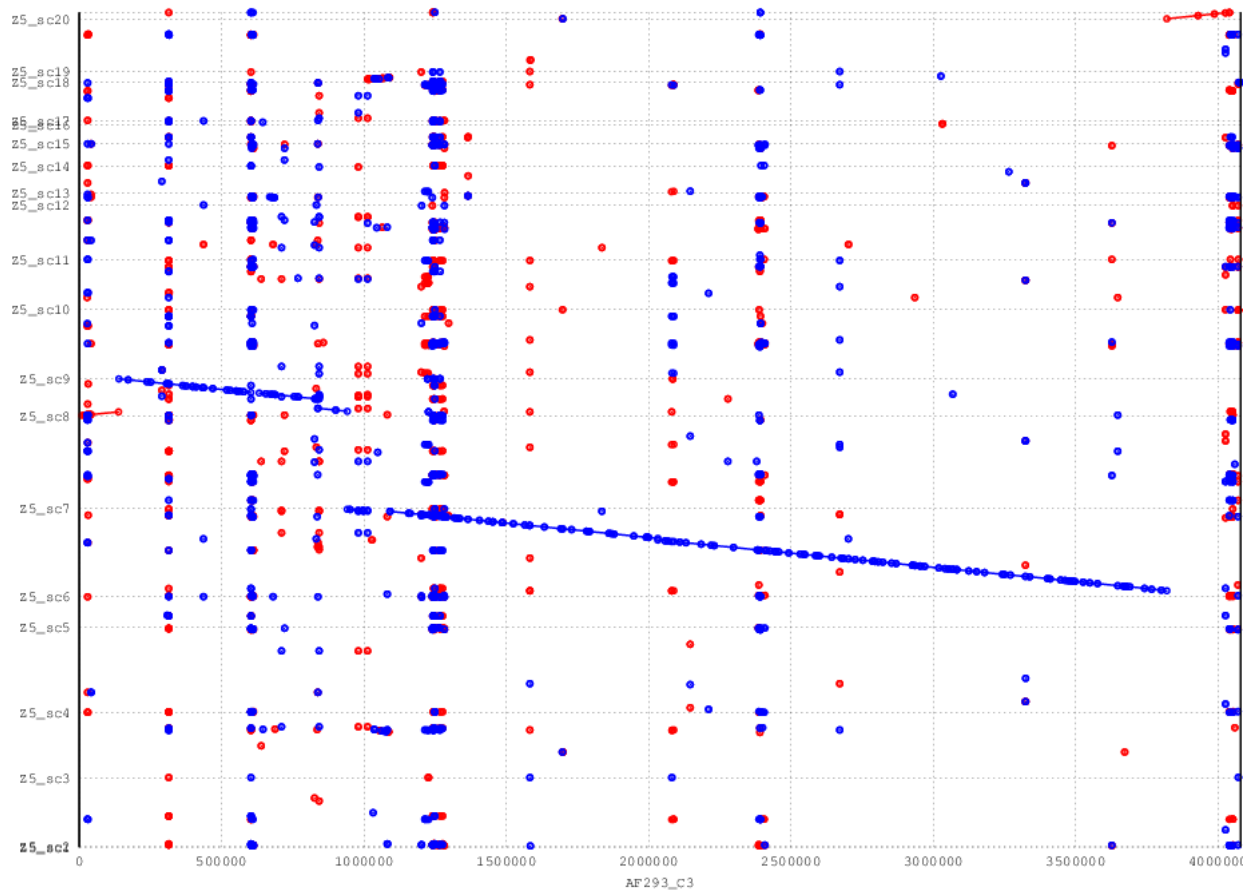

**d:** scaffolds matched to chromosome 4 of af293 ( y-axis: all scaffolds, x-axis: chromosome 4)

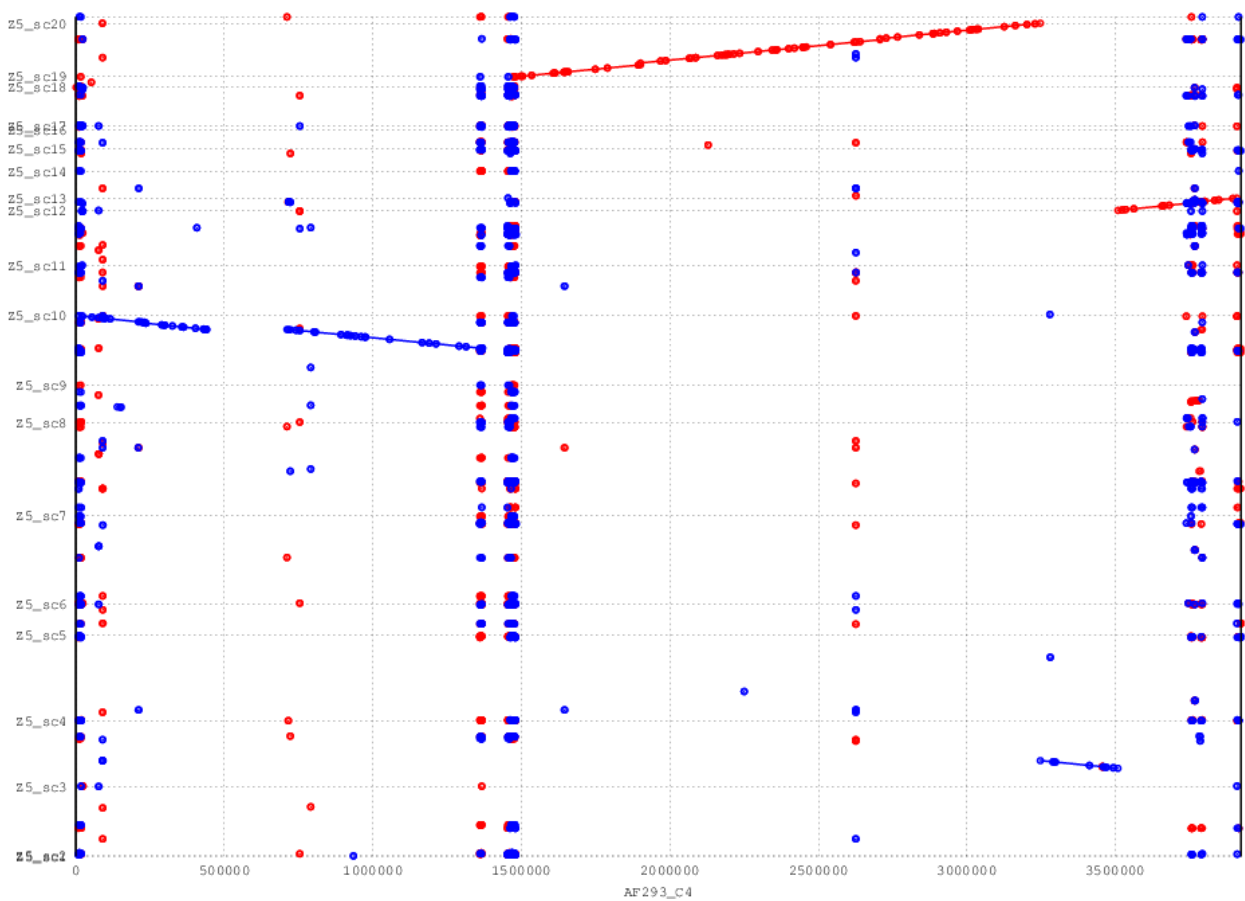

**e:** scaffolds matched to chromosome 5 of af293 ( y-axis: all scaffolds, x-axis: chromosome5)

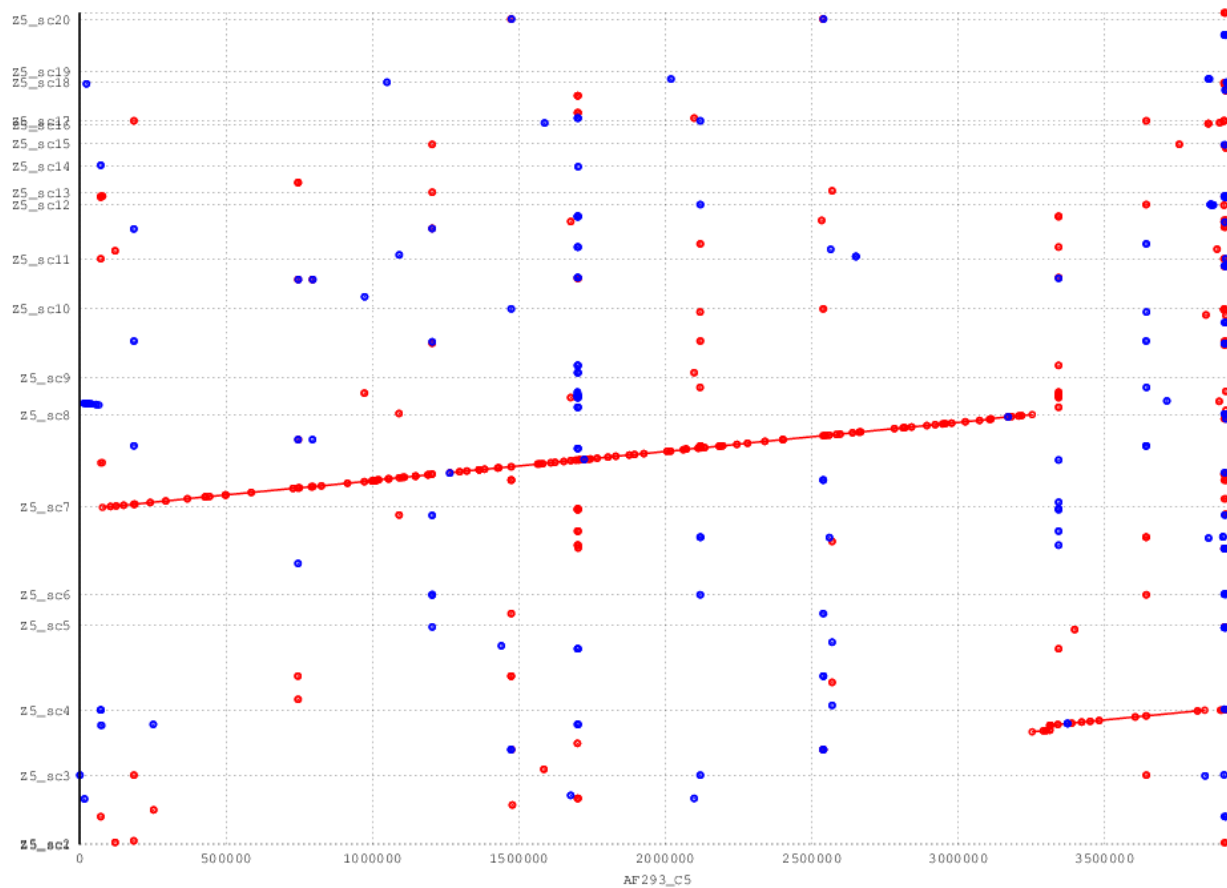

**f:** scaffolds matched to chromosome 6 of af293 ( y-axis: all scaffolds, x-axis: chromosome6)

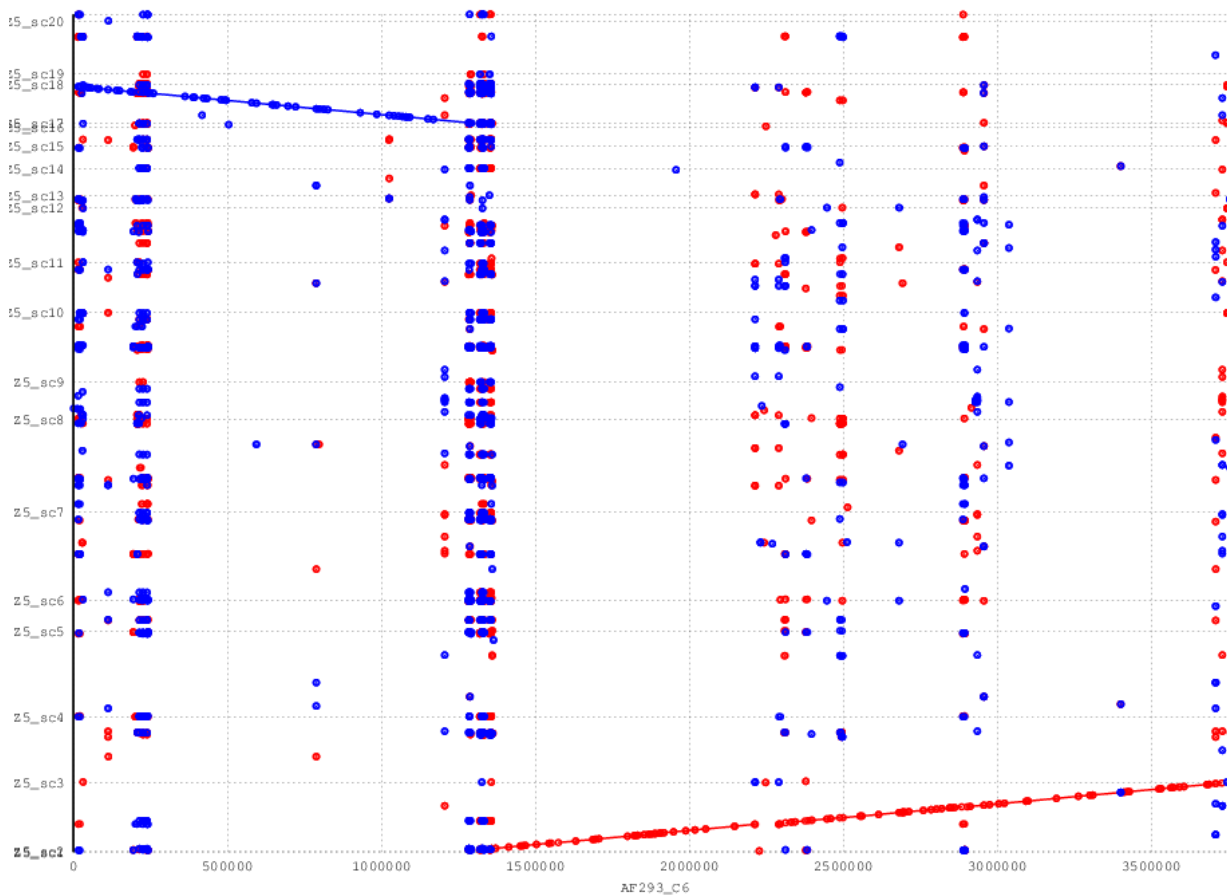

**g:** scaffolds matched to chromosome 7 of af293 ( y-axis: all scaffolds, x-axis: chromosome 7)

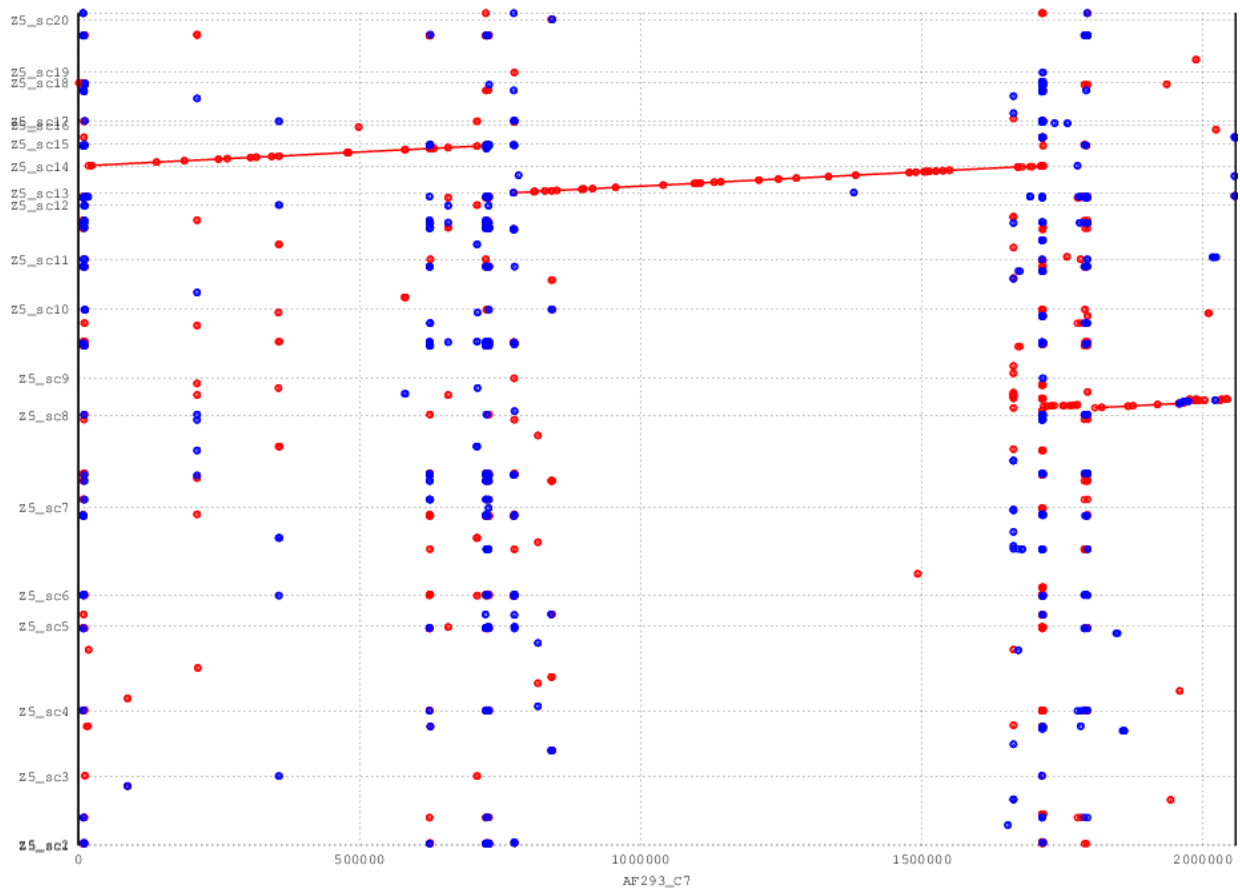

**h:** scaffolds matched to chromosome 8 of af293 ( y-axis: all scaffolds, x-axis: chromosome 8)

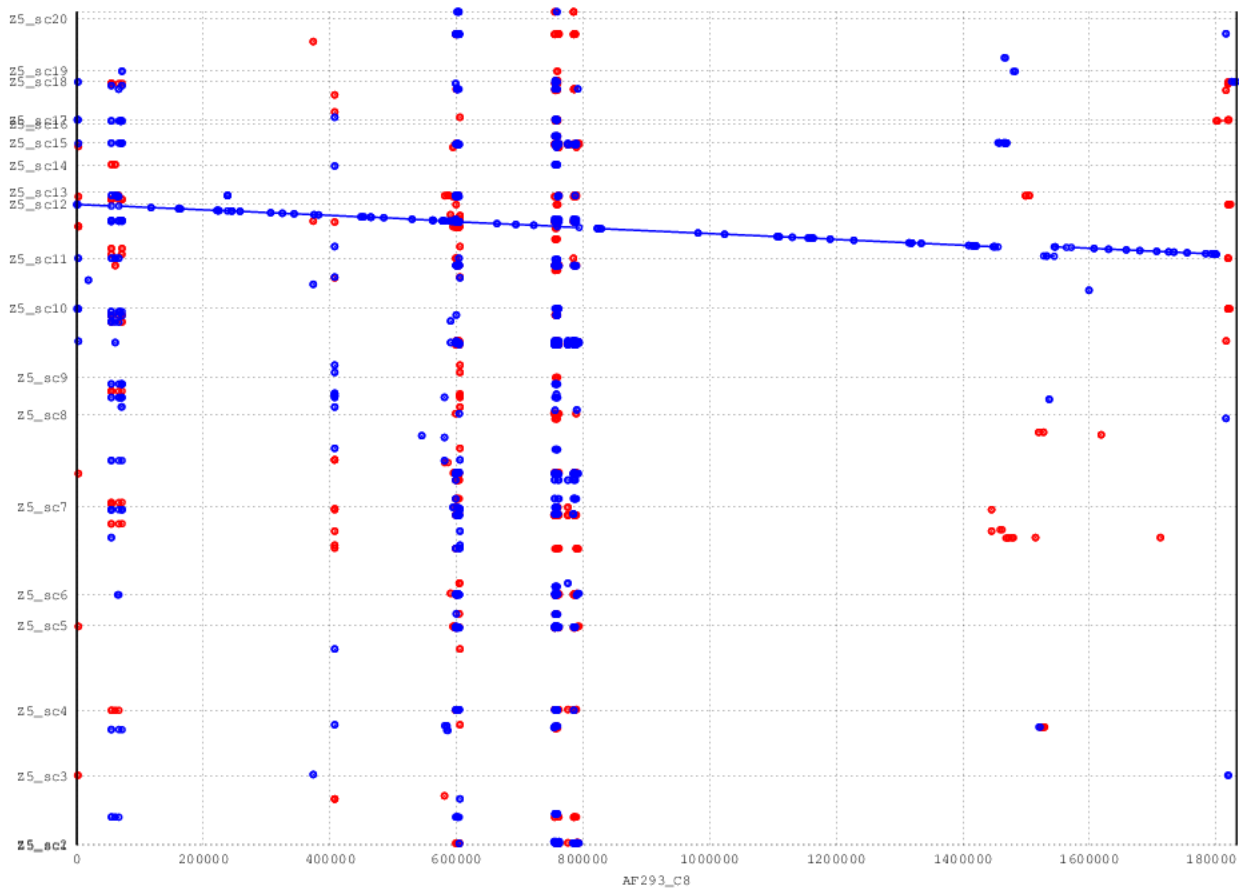

Supplement: 12864_2015_1658_MOESM2_ESM.pdf [file 12864_2015_1658_MOESM2_ESM.pdf]
